1 **Overruled by nature: A plastic response to an ecological regime**  
2 **shift disconnects a gene and its trait**

3 F. Besnier<sup>1\*</sup>, Ø. Skaala<sup>1</sup>, V. Wennevik<sup>1</sup>, F. Ayllon<sup>1</sup>, K.R. Utne<sup>1</sup>, P.T. Fjeldheim<sup>1</sup>, K.  
4 Andersen-Fjeldheim<sup>1</sup>, S. Knutar<sup>1</sup>, K.A. Glover<sup>1,2</sup>

5  
6 <sup>1</sup> Institute of Marine Research, Bergen, Norway  
7 <sup>2</sup> Institute of Biology, University of Bergen, Norway  
8 \*Corresponding author  
9

10

## 11 **Abstract**

12 In Atlantic salmon, age at maturation is a life history trait ruled by a sex-specific  
13 trade-off between reproductive success and survival. Following an ecological regime  
14 shift in 2005, many North Atlantic salmon populations currently display smaller size  
15 at age and delayed age at maturation. However, whether this change reflects rapid  
16 evolution or plastic response is unknown. Some 1500 historical and contemporary  
17 salmon from river Etne (Western Norway) genotyped at 50k SNPs revealed three  
18 loci significantly associated with age at maturation. These included *vgll3* and *six6*,  
19 which collectively explained 36 to 50% of the age at maturation variation in the 1983-  
20 1984 period. Strikingly, the combined influence of these genes was nearly absent in  
21 all samples from 2013-2016, despite allelic frequencies at *vgll3* remaining  
22 unchanged. We conclude that the regime shift has led to the sudden bypassing of  
23 the influence of *vgll3* and *six6* on maturation through growth-driven plasticity.

24

## 25 **Introduction**

26 Understanding the mechanisms by which organisms adapt to their environments is a  
27 central question in biology (Losos 2000; Andrew *et al.* 2013). However, beyond the  
28 academic curiosity that motivates biologists to investigate how species evolved and  
29 adapted until now, accelerating climate change and ongoing habitat destruction  
30 catalyses a sense of urgency when considering the fate of many species in the  
31 future. As unprecedentedly fast environmental changes have occurred for many taxa  
32 during the last half century (Chevin *et al.* 2010; Dullinger *et al.* 2012; Pörtner *et al.*  
33 2022), the current mechanisms of adaptation of many species may not couple with  
34 the pace at which environmental change is now occurring, leading thus to population  
35 declines and extinctions. Consequently, the mechanisms of adaptation and their  
36 potential to remain effective in a context of rapidly changing environment are  
37 becoming increasingly important to understand (García de Leániz *et al.* 2007;  
38 Candolin & Heuschele 2008; Kwan *et al.* 2008; Bandillo *et al.* 2017).

39 In the context of environmental change, genes associated with sexual  
40 conflicts (Parker 1974) are of particular interest. Sexual conflicts are associated with  
41 sex-specific selection and therefore expected to promote genetic diversity in the  
42 underlying genes (Rowe *et al.* 2018), thus potentially helping maintain standing  
43 genetic variation on important fitness traits within the population. An illustration of  
44 this occurs in anadromous Atlantic salmon (*Salmo salar* L.) where a single gene  
45 (*vgll3*) is strongly associated with the age at maturation, a highly adaptative trait  
46 subject to sexual conflict (Ayllon *et al.* 2015; Barson *et al.* 2015). In many species,  
47 age at maturation represents a trade-off, as late-maturation gives larger body sizes  
48 and thus higher reproductive success, but at the increased risk of dying before  
49 reproduction (Fleming & Einum 2011). In Atlantic salmon, the optimum value for this

50 trait differs between sexes, as males mature earlier and smaller whereas females  
51 benefit from later maturation and a larger body size resulting in more and larger eggs  
52 (Fleming & Einum 2011). This sexual conflict is in part resolved by the mediation of  
53 *vgll3* (Barson *et al.* 2015) through sex-specific dominance.

54         Studies of *vgll3* and age of maturation in Atlantic salmon have resulted in  
55 inconstant estimations regarding the degree to which this gene influences the trait.  
56 Several studies have demonstrated a very strong association in wild North European  
57 populations (Ayllon *et al.* 2015; Barson *et al.* 2015; Czorlich *et al.* 2018; Jensen *et al.*  
58 2022), but in stark contrast, little or no association has been observed in wild  
59 populations in North America (Boulding *et al.* 2019; Mohamed *et al.* 2019).  
60 Furthermore, conflicting observations have also been reported in domesticated  
61 Norwegian farmed strains reared under aquaculture conditions (Ayllon *et al.* 2019;  
62 Sinclair-Waters *et al.* 2020). This begs the question, why does the influence of *vgll3*  
63 on age at maturation vary so greatly?

64         Salmonids have been exposed to a wide range of anthropological challenges  
65 including habitat modifications since the Industrial Revolution (Forseth *et al.* 2017).  
66 Furthermore, during the past two decades, most salmon populations in the North  
67 Atlantic have shifted towards later maturation (Otero *et al.* 2012; Vollset *et al.* 2022)  
68 and smaller size at age (Quinn *et al.* 2006; Bal *et al.* 2017; Todd *et al.* 2021; Vollset  
69 *et al.* 2022). Although these changes are thought to be caused by a regime-shift in  
70 oceanic conditions in 2005 (Vollset *et al.* 2022), whether they reflect rapid evolution  
71 or plastic responses is unknown. The same trends towards later maturation have  
72 also been documented in the salmon population inhabiting the river Etne on the west  
73 coast of Norway, where the proportion of fish maturing after one year at sea dropped  
74 from 63% in the period 1983-84 to 34% in 2018-19 (Harvey *et al.* 2022). The main

75 objective of the present study was to investigate whether the observed changes in  
76 age at maturation were the result of phenotypic plasticity, or alternatively, evolution  
77 in the gene(s) influencing this trait. To address this, we genotyped historical (early  
78 1980's – pre regime shift) and contemporary (mid 2010's post regime shift) samples  
79 with a 50k panel of genome-wide SNPs. This approach revealed the dissociation  
80 between age at maturation and two loci, *vgll3* and *six6*, that explained 36 to 50% of  
81 the variation in the 1983-1984 period, but only 7% in the most recent samples.

82

## 83 **Material and Methods**

### 84 **Samples**

85 This study is based on samples obtained from adult salmon captured in the river  
86 Etne, in western Norway, 60° N. This river is home to a salmon population of  
87 typically 1000-2500 adults returning from the sea annually (Harvey *et al.* 2017). A  
88 permanent trapping facility installed in the river has permitted sampling almost the  
89 entire adult spawning population since 2014, which facilitated access to both an  
90 extensive set of DNA samples, as well as to phenotypic and phenological data. For  
91 the present study, 797 wild adult salmon captured in the 1983-84 angling season  
92 were compared to 751 wild adult salmon captured in the upstream fish trap in the  
93 period 2013 to 2016 (Besnier *et al.* 2022). For the contemporary samples (2013-  
94 2016), an estimation of individual genetic admixture was computed as the proportion  
95 of domestic ancestry in each individuals genome (see Besnier *et al.* (2022) for  
96 details). In addition, a sample of 350 domesticated farmed salmon escapees that  
97 were removed from the river in the period 1989-2012 (15 per year), were genotyped  
98 with the same set of markers.

99

## 100 **Genotyping and sex determination**

101 All samples were genotyped on a ThermoFisher Axiom 57K single nucleotide  
102 polymorphism (SNP) array (NOFSAL03, 55735 markers) developed by Nofima  
103 (Norwegian institute for applied research in food aquaculture and fisheries) in  
104 collaboration with private aquaculture companies Mowi and SalmoBreed (Besnier *et*  
105 *al.* 2022). SNPs were checked following the “Best Practice Workflow” on the  
106 Affymetrix axiom analysis software (available at:  
107 [https://www.thermofisher.com/no/en/home/technical-resources/software-](https://www.thermofisher.com/no/en/home/technical-resources/software-downloads.html)  
108 [downloads.html](https://www.thermofisher.com/no/en/home/technical-resources/software-downloads.html)). SNPs with call rates lower than 0.97 and samples with call rates  
109 lower than 0.85 were discarded, whereas markers classified as “PolyHighResolution”  
110 (High resolution in both homozygous and heterozygous clusters) were conserved for  
111 further data analysis.

112 Fish were sexed by examining variants of the sdY gene (Yano *et al.* 2012;  
113 Eisbrenner *et al.* 2014); *i.e.*, males were identified based on the presence of exons 2  
114 and 4. Samples were genotyped on an Applied Biosystems ABI 3730 Genetic  
115 Analyser, and genotypes were called using GeneMapper (Applied Biosystems, v.  
116 4.0). The analysis of the sdY gene provides an accurate identification of sex,  
117 although, a very low percentage of fish identified as genetic males are phenotypic  
118 females due to carrying an inactive pseudo-copy of the sdY gene with both exon 2  
119 and 4 (Ayllon *et al.* 2020).

120

## 121 **Genome scan for loci associated with age at maturation**

122 Age at maturation was modeled as a binary trait consisting of early maturing fish,  
123 *i.e.*, fish returning after one sea-winter (1SW), also known as grisling, vs. late  
124 maturing fish, *i.e.*, fish returning after two or more winters at sea (2<sup>+</sup>SW). The

125 probability of maturing early was then modeled in a generalized linear model with  
126 logit link function:

$$127 \quad \log\left(\frac{P_{(e)}}{1-P_{(e)}}\right) = G_i + sex + year + e \quad (\text{Model 1})$$

128 Where  $P_{(e)}$  is the probability of early maturing,  $G_i$  is the SNP genotype at locus  $i$ ,  $sex$   
129 is a binary factor accounting for genetically determined sex,  $year$  is a factor  
130 accounting for the sampling year, and  $e$  a normally distributed vector of residuals.  
131 Significance of association between genotype and sea age was estimated by  
132 comparing the deviance of Model 1 with the deviance of the model without genetic  
133 effect. The difference was compared to a Chi-squared distribution with one degree of  
134 freedom. Model 1 was fitted at each SNP available on the dataset, and the obtained  
135 p-values were adjusted for multiple testing by following Bonferroni correction. All p-  
136 values given in the genome scan result section are corrected for multiple testing.

137

### 138 **Haplotyping**

139 Haplotypes were reconstructed using the Phase 2.1 software (Stephens *et al.* 2001)  
140 in the historical and contemporary data separately. Two loci on SSA9 and SSA25  
141 were more specifically considered for haplotype reconstruction as they displayed  
142 high association with age at maturation, and associated genes *vgll3* and *six6* were  
143 previously described in the same two genomic regions (Ayllon *et al.* 2015; Barson *et*  
144 *al.* 2015; Czorlich *et al.* 2018). On SSA25, a haplotype window consisting of four  
145 polymorphic SNPs (AX-87309414, AX-172546510, AX-87309615, AX-87420691)  
146 was reconstructed in the region spanning from 28.65 to 28.66 Mb containing *vgll3*  
147 (<https://www.ncbi.nlm.nih.gov/gene/106586514>). On SSA09, a haplotype window  
148 consisting of three SNPs (AX-172546568, AX-88029383, AX-87668000), spanning

149 from 24.86-24.95Mb was reconstructed around the position of *six6*.  
150 (<https://www.ncbi.nlm.nih.gov/gene/106610974>)

151

## 152 **Statistical analyses**

### 153 ***Genetic structure to age at maturation variation***

154 Due to the sex specific dominance observed in *vgll3*, the genetic structure was  
155 estimated for males and females separately. The probability of early maturation was  
156 modeled as a response to additive and dominance genetic effects as follow:

$$157 \log \frac{P_{(e)}}{1-P_{(e)}} = a_i + d_i + year + e \quad (\text{Model 2})$$

158 Where  $P_{(e)}$  is the probability of early maturing,  $a_i$  and  $d_i$  are respectively the additive  
159 and dominance effects at locus  $i$ ,  $year$  is a factor accounting for the sampling year,  
160 and  $e$  a normally distributed vector of residuals. The model was fitted in a GLM with  
161 logit link function in R (Team 2022), and the variance contribution was deduced from  
162 the difference in model deviance between Model 2 and a model than only accounted  
163 for capture year. Two loci interaction models were tested similarly by accounting for  
164 the additional interaction parameters between loci  $i$  and  $j$ . In contrast with the  
165 genome scan, the test for significance if the different genetic parameters were not  
166 corrected for multiple testing. All p-values given with the estimation of genetic effect  
167 are nominal values.

168

### 169 ***Comparison in age at maturation***

170 Potential differences in age at maturation between historical and contemporary  
171 samples was tested by chi-squared test on a contingency table reporting the number  
172 of observed 1, 2 and 3+ sea winter adults within historical and contemporary  
173 samples.



174

175 ***Size at age***

176 Individual body length was recorded for every fish passing the trap in the  
177 contemporary sample, whereas the adult length of the 1983-1984 fish were  
178 calculated from reading scales samples. In addition, the growth at first sea winter  
179 was estimated for both historical and contemporary samples by calculating length at  
180 first sea winter from reading scales. The difference in length between samples from  
181 1983-1984 and from 2013-2016 was tested with a two-sided t-test, separately for  
182 each sea-age and sex categories.

183

184 ***Potential role of admixture***

185 The salmon population in the river Etne has been subject to introgression from  
186 domesticated salmon escaping from commercial fish farms, with an average 24% of  
187 genetic admixture in the contemporary population (Glover *et al.* 2013; Karlsson *et al.*  
188 2016; Besnier *et al.* 2022). Individual admixture with domesticated salmon has  
189 already been correlated with earlier adult maturation in this population (Besnier *et al.*  
190 2022). Therefore, in order to account for the potential influence of admixture on the  
191 temporal influence of loci on age at maturation in this population, we investigated  
192 whether the change in genetic architecture of age at maturation could be linked to  
193 genetic admixture.

194 A third model was fitted with the aim to evaluate a potential interaction  
195 between admixture and *vgll3* or *six6* genotypes.

196 
$$\log \frac{P(e)}{1-P(e)} = a_i * admix + d_i * admix + year + e \quad (\text{Model 3})$$

197 Where *admix* is the individual genetic admixture as computed in Besnier *et al.*  
198 (Besnier *et al.* 2022) .

199

## 200 **Results**

### 201 **Temporal changes in age and size at maturation**

202 Marine growth was compared between the historical (1983-84) and contemporary  
203 (2013-16) samples. During this period, the length of the fish during the first winter at  
204 sea decreased significantly, as well the length of the two sea-winter (2SW) adults,  
205 while the length of the one sea-winter (1SW) adults remained stable (Table 1).

206 During the same period, we also observed a trend towards later maturation  
207 with a strong decline of the frequency of the fish maturing after one winter at sea  
208 from 46% to 8% for the females ( $\chi^2=120$ ,  $df=1$ ,  $p<2.10^{-16}$ ), and from 75% to 58% for  
209 the males ( $\chi^2=25$ ,  $df=1$ ,  $p=4.10^{-7}$ ) (Table 2).

210

### 211 **Genome scans**

212 The genome scan for age at maturation (Fig.1) identified three loci displaying a  
213 significant association in the historical samples, one on each of chromosomes  
214 SSA09, SSA24 and SSA25. The genomic regions identified in SSA25 and SSA09  
215 overlapped with loci previously described as major contributors to the sea age  
216 variability in salmon: *vgll3* on SSA25 and *six6* located on SSA09. The degree of  
217 association between age at maturation and these genomic regions was investigated  
218 further in the historical and contemporary dataset.

219

### 220 ***vgll3* and *six6* haplotypes**

221 Haplotypes were reconstructed in the historical and contemporary samples  
222 separately, across the genomic regions in SSA25 and SSA9 that contained the *vgll3*  
223 and *six6* genes respectively. On SSA25, two haplotypes were predominant in the

224 historical samples with frequencies of 56% and 39% (Table 3) and respectively  
225 associated with early and late sea age. The mean sea age was 1.18 for the  
226 homozygous haplotype “1221”, and 2.46 for the homozygous haplotype “2112”,  
227 which will thus be referred to as *vgll3*-E and *vgll3*-L alleles from hereon. In the  
228 contemporary samples, the same two haplotypes were found in almost identical  
229 frequencies (df=1,  $\chi^2=0.85$ , p=0.35) to the historical samples (59% and 39% for  
230 *vgll3*-E and *vgll3*-L respectively), indicating that no temporal change in haplotype  
231 frequencies occurred at this locus during the three-decade period.

232 The mean age at maturation in each genotype class (Fig. 2) displayed a  
233 strong association with an additive effect of *vgll3* on female sea age in the historical  
234 data (Fig. 2.A, Table.S1), whereas association of *vgll3* almost disappeared in the  
235 contemporary female data (Fig. 2.C, Table.S1). For the historical male data (Fig. 2B,  
236 Table.S1), a strong *vgll3* association with a dominant *vgll3*-E allele was also  
237 detected, whereas the genetic association was strongly reduced in the contemporary  
238 data (Fig. 2.D, Table.S1).

239 On SSA09, four main haplotype sequences linked to the *six6* gene were  
240 predominant in both historical and contemporary samples (Table 3). With a  
241 respective sea age of 1.3 and 1.4 years for the homozygous fish in the historical  
242 samples, both “111” and “211” haplotypes were assigned to the early variant of *six6*,  
243 whereas haplotypes “121” and “122”, with a respective mean sea age of 1.9 and 2.1  
244 years, were assigned to the late variant. Following this, we observed an increase in  
245 frequency of the *six6* late variant, from 44% in the historical samples to 60% in the  
246 contemporary samples (df=1  $\chi^2=111$ , p<2.2.10<sup>-16</sup>). The mean age at maturation in  
247 each genotype class (Fig. 2) showed an additive effect of *six6* in the historical female  
248 data (Fig. 2.A, Table.S2), and historical male data (Fig. 2.B Table.S2). In contrast,

249 we didn't observe any association between *six6* and sea age in the contemporary  
250 data (Fig. 2.C,D Table.S2).

251 Cumulatively, *vgll3* and *six6* accounted for 50% of the model deviance in the  
252 historical male dataset and 36% in the historical female dataset. In stark contrast, the  
253 same loci only accounted for 7% and 3% of the model deviance in the contemporary  
254 male and female datasets respectively.

255 Testing the interaction between these loci revealed significant departure from  
256 additivity between *vgll3* and *six6* in the males of the historical samples (Table.S3).  
257 This interaction is illustrated in Fig. 2.b where the *six6* genotype is only associated  
258 with age at maturation for the samples that are homozygous for the *vgll3-L* allele. No  
259 significant departure from additivity was observed in the historical female (Table.S3).

260

## 261 **Genetic admixture**

262 The salmon population inhabiting the river Etne has been subject to introgression  
263 from domesticated farmed escapees. We therefore tested whether the observed  
264 temporal change in genetic architecture of age at maturation could be linked to  
265 admixture with farmed fish. When predicting age at maturation from the joined effect  
266 of admixture and genotype, no interaction was detected between individual  
267 admixture and *vgll3* genotype ( $\chi^2=3.6$ ,  $df=2$ ,  $p=0.161$ ), nor between individual  
268 admixture and *six6* genotype ( $\chi^2=2.7$ ,  $df=2$ ,  $p=0.24$ ). We also checked the allelic  
269 frequencies at the *six6* locus in the farmed samples to assess if the increase in *six6-L*  
270 *L* allele observed in the contemporary sample could be explained by admixture. With  
271 17% *six6-E* and 68% *six6-L* allele, haplotype frequencies in the farmed samples  
272 were more like the contemporary samples than the historical. However, the observed  
273 genetic admixture in this population, which is estimated to circa 24%, could only

274 explain a 6% increment in frequency of *six6-L*, which is less than half of the increase  
275 observed between historical and contemporary samples.

276

## 277 **Discussion**

278 We document the sudden dissociation between age at maturation in a population of  
279 Atlantic salmon and the genotypes of three loci, including the previously identified  
280 candidate genes *vgll3* and *six6* (Ayllon *et al.* 2015; Barson *et al.* 2015; Czorlich *et al.*  
281 2018). This dissociation was observed in samples separated by a 30-year time  
282 interval and was accompanied by an increase in the frequency of late maturing allele  
283 at the *six6* locus, while no change was observed at the *vgll3* locus. The salmon  
284 population in the river Etne has been subject to introgression from domesticated  
285 salmon escaping from commercial fish farms, with an average 24% of genetic  
286 admixture in the contemporary population (Glover *et al.* 2013; Karlsson *et al.* 2016;  
287 Besnier *et al.* 2022). However, genetic admixture could not explain alone the change  
288 in allelic frequencies observed at *six6*, nor the dissociation between the genes and  
289 age at maturation.

290 The combined effect of *vgll3* and *six6* was not fully additive as we detected a  
291 significant epistatic interaction in the historical samples of males. *Six6* was  
292 previously identified as a candidate locus associated with age at maturation (Barson  
293 *et al.* 2015), but little is known about the genetic effects of this locus. The work  
294 presented here is the first to document a sex-specific interaction between *vgll3* and  
295 *six6*.

296 In the river Etne, the frequency of late maturing fish was higher among  
297 females than among males. This difference is assumed to be the result of adaptation  
298 to sexual conflict where the advantage of maturing late is greater for females than for

299 males (Fleming & Einum 2011). With the *vgll3-E* allele being dominant in males only,  
300 *vgll3* is believed to play a key function in the resolution of sexual conflict in the  
301 optimal age of maturation in salmon (Ayllon *et al.* 2015; Barson *et al.* 2015).  
302 However, with the present results documenting the almost complete dissociation  
303 between age at maturation and *vgll3* genotypes in parallel with a trend towards later  
304 maturation strategy in both sexes simultaneously, the perennity of local adaptation in  
305 the population inhabiting the river Etne can be questioned. Noteworthy, sex-specific  
306 strategies of maturation seem to perdure in the population despite *vgll3*'s  
307 contribution being almost completely eradicated in the contemporary samples. In  
308 fact, the difference in early-maturation frequencies between males and females  
309 increases in the contemporary dataset, strongly suggesting that other mechanisms  
310 are acting instead of, or in parallel with *vgll3*, to maintain sex specific age at  
311 maturation. This hypothesis seems consistent with the description of multiple loci  
312 associated with age at maturation (Sinclair-Waters *et al.* 2020).

313         The absence of association between *vgll3* and age at maturation in multiple  
314 North American populations (Boulding *et al.* 2019; Mohamed *et al.* 2019) already  
315 suggested that *vgll3* is not the only regulator of sexual conflict for age of maturation  
316 in Atlantic salmon. The present study confirms this observation and further shows  
317 that the relative influence of *vgll3* is not stable in time. In the case of the population in  
318 the river Etne, our data reveals that other unidentified factors also play a major role  
319 in maintaining the sex-specific differences in maturation strategies when the link  
320 between age at maturation and *vgll3* is disconnected.

321         The observed trend towards slower marine growth and later maturation in the  
322 population inhabiting the river Etne has also been reported in many other salmon  
323 populations in the North Atlantic (Quinn *et al.* 2006; Otero *et al.* 2012; Bal *et al.* 2017;

324 Todd *et al.* 2021; Vollset *et al.* 2022). While the precise triggers and mechanisms  
325 underpinning to the development of sexual maturation are not yet fully understood in  
326 Atlantic salmon (Mobley *et al.* 2021), slow growth and late maturation is consistent  
327 with the hypothesis of size or perhaps growth-rate threshold as a determinant for  
328 salmon maturation (Rowe *et al.* 1991; Simpson 1992; Taranger *et al.* 2010). Such an  
329 energy-budget threshold might also be genetically regulated through the mediation of  
330 *vgll3*, which has been shown to be linked with cell fat regulation (Halperin *et al.*  
331 2013) or *six6* which has been linked to stomach fullness and prey composition  
332 (Aykanat *et al.* 2020). Following this hypothesis, slow growth due to environmental  
333 conditions, such as lack of prey would lead to later maturation as a higher proportion  
334 of fish would fail to reach the weight (or growth-rate) threshold for maturation after  
335 one single year at sea.

336 Observations suggest important changes in the environmental conditions met  
337 by salmon migrating from the river Etne in the period 1980-2010 (Vollset *et al.* 2022).  
338 The marine migration pattern for salmon originating from the river Etne is not fully  
339 known, however, the first phase is probably a northward migration through the  
340 southern Norwegian Sea (Gilbey *et al.* 2021) where changes in the oceanographic  
341 conditions have been reported in the last years. For example, water temperature  
342 increased by nearly 1°C at 50-200 m depth from early 1980's until 2021, mainly due  
343 to warmer water masses flowing into the southern Norwegian Sea (Skagseth & Mork  
344 2012; ICES 2021a). The early 1980's are also considered as the end of "The great  
345 salinity anomaly", which was a period with large inflow of cold and fresh Arctic water  
346 into the Norwegian Sea. The large proportion of Arctic water entering the Norwegian  
347 Sea is correlated to increased productivity (Skagseth *et al.* 2022), and to improved  
348 feeding conditions for post-smolts in the region (Utne *et al.* 2022). Therefore, salmon

349 returning in 1983 and 1984 had probably been feeding in a very productive sea  
350 during the initial post-smolt phase, whereas salmon returning to rivers in 2013-2016  
351 had been feeding in a warm and saline Norwegian Sea. During this later period,  
352 observed stomach fullness and condition factor for post-smolt sampled in the  
353 Norwegian Sea were low (Utne *et al.* 2021a). In addition, the potential interspecific  
354 competition with other pelagic fish for prey (Utne *et al.* 2021b) was low in the early  
355 1980's as the total biomass of pelagic fish feeding in the Norwegian Sea in 1982-  
356 1983 was around 1/3 of the total biomass in the period 2013-2016 (ICES 2008,  
357 2021b) when Norwegian Spring-spawning herring had not yet recovered from the  
358 collapse in the late 1960ies, and NEA-mackerel and blue whiting stock biomasses  
359 were at low levels (ICES 2008). Many observations seem to confirm that  
360 environmental conditions were less favorable for salmon growth in the last decade  
361 than in the early 1980's. It is thus conceivable that the changes observed in the river  
362 Etne are caused by environmental perturbations occurring over a large region and  
363 affecting salmon populations as well as other organisms.

364 Under commercial aquaculture conditions, farmed Atlantic salmon typically  
365 display early sexual maturation (Taranger *et al.* 2010), and importantly, the relative  
366 influence of *vgll3* on age at maturation appears to be largely bypassed (Ayllon *et al.*  
367 2019). Yet again, this response is sex-specific as a study conducted under  
368 aquaculture conditions (Ayllon *et al.* 2019) reported that *vgll3* did not show any  
369 correlation with age at maturation in females while displaying only weak association  
370 in males (Ayllon *et al.* 2019). The commercial farm strain used in the aforementioned  
371 study, known as Mowi, stemmed from wild Norwegian salmon populations in which  
372 *vgll3* was identified as a candidate gene for influencing age at maturation (Ayllon *et*  
373 *al.* 2015; Barson *et al.* 2015). The authors concluded that high calorie feed intake



374 combined with artificial light and temperature regimes as well as potential genetic or  
375 epigenetic components, may alter the impact of *vgll3* on age at maturation (Ayllon *et*  
376 *al.* 2019). Anecdotally, it is also worth noting that despite multiple generations of  
377 directional selection against early maturing fish in the domesticated farmed salmon,  
378 the genetic variability of *vgll3* remains high in the Mowi strain (Ayllon *et al.* 2019). It is  
379 thus possible that a rapid change in environmental conditions, such as feed intake  
380 and therefore growth-rate, may bypass the effect of *vgll3* without letting selection  
381 (artificial selection in this case) alter the allelic frequencies of the gene.

382 We thus can hypothesize a two-threshold model where the effect of *vgll3* on  
383 age at maturation is bypassed when abundance of feed resources is very high, as in  
384 farming conditions, or when feed resources are very low and fish need to spend  
385 more time at sea to acquire the necessary energy-reserves for maturation and  
386 reproduction. When resource availability falls between both thresholds, *vgll3* may  
387 play a more important role in determining age at maturation. Inversely if feed  
388 resources exceed the high threshold, or do not reach the low one, *vgll3* is bypassed  
389 by environmental conditions, and therefore age at maturation is determined by a  
390 combination of other genetic and environmental factors.

391 In the face of changing environmental conditions, one may expect the allelic  
392 frequencies at the associated loci to change in response to the newly induced  
393 selection pressure (Czorlich *et al.* 2018; Jensen *et al.* 2022). This is the case for *six6*  
394 where the temporal trend towards later maturation is accompanied by an increase of  
395 the *six6-L* allele frequency. This shift in allelic frequencies is likely due to positive  
396 selection on the *six6-L* allele, alone, or in conjunction with admixture from  
397 domesticated salmon where *six6-L* was found in higher frequency. In contrast, the  
398 *vgll3* allelic frequencies remained stable despite major changes in age at maturation.

399 This result seems to indicate a change in environmental conditions, creating a  
400 situation where the influence of *vgll3* was effectively bypassed before natural  
401 selection had time to operate, whereas selection had the time to modify the allelic  
402 frequencies at the *six6* locus before the influence of this gene was also bypassed.  
403 This hypothesis is strongly supported by the observations of sudden change in age  
404 at maturation in many Atlantic salmon populations inhabiting Northeast Atlantic rivers  
405 (Vollset *et al.* 2022), including the population in the river Etne (Harvey *et al.* 2022),  
406 where a highly distinct and sudden drop in early marine growth was reported in 2005  
407 and subsequently, referred to as an ecological regime shift in the northeast Atlantic  
408 ocean (Vollset *et al.* 2022).

409 As this, and other salmon population in the Northeast Atlantic were subjected  
410 to the same ecological regime shift, leading to consistently reduced marine growth  
411 rates and increased age at maturation, we conclude that growth-driven plasticity has  
412 almost completely bypassed the combined influence of *vgll3* and *six6* within on age  
413 at maturation, and furthermore, on resolving the sexual conflict for this trait in Atlantic  
414 salmon. Together with the interaction between *vgll3* and *six6* described in the  
415 historical data, the dissociation between genes and age at maturation represents an  
416 original finding that changes our understanding of the genetic architecture of age at  
417 maturation in Atlantic salmon.

418

#### 419 **Acknowledgments**

420 This work was financed by the Norwegian Ministry of Trade, Industry and Fisheries.  
421 This authority paid no part in the study design nor interpretation of results. We would  
422 like to acknowledge the research institute Nina, and anglers, for donating some of  
423 the farmed salmon samples used in this study. We would like to acknowledge the

424 river Etne owners association for continued collaboration and allowing capture and  
425 handling of fish and IMR staff involved in monitoring the population in the trap. We  
426 would like to thank María Quintela for insightful comments on the earlier drafts of the  
427 manuscript, and Emily K. Glover for drawing the salmon used in Figure 1.

428

#### 429 **Data availability**

430 Data for this study are available from the IMR.brage.unit.no public repository.

431 Link to data: <https://imr.brage.unit.no/>

432

433

## 434 References

- 435 1.
- 436 Andrew, R.L., Bernatchez, L., Bonin, A., Buerkle, C.A., Carstens, B.C., Emerson, B.C. *et al.*
- 437 (2013). A road map for molecular ecology. *Mol. Ecol.*, 22, 2605-2626.
- 438 2.
- 439 Aykanat, T., Rasmussen, M., Ozerov, M., Niemela, E., Paulin, L., Vaha, J.P. *et al.* (2020). Life-
- 440 history genomic regions explain differences in Atlantic salmon marine diet
- 441 specialization. *J Anim Ecol*, 89, 2677-2691.
- 442 3.
- 443 Ayllon, F., Kjaerner-Semb, E., Furmanek, T., Wennevik, V., Solberg, M.F., Dahle, G. *et al.*
- 444 (2015). The *vgll3* locus controls age at maturity in wild and domesticated Atlantic
- 445 salmon (*Salmo salar* L.) males. *PLoS Genet.*, 11, e1005628.
- 446 4.
- 447 Ayllon, F., Solberg, M.F., Besnier, F., Fjellidal, P.G., Hansen, T.J., Wargelius, A. *et al.* (2020).
- 448 Autosomal sdY pseudogenes explain discordances between phenotypic sex and DNA
- 449 marker for sex identification in Atlantic salmon. *Front. Genet.*, 11, 544207.
- 450 5.
- 451 Ayllon, F., Solberg, M.F., Glover, K.A., Mohammadi, F., Kjaerner-Semb, E., Fjellidal, P.G. *et al.*
- 452 (2019). The influence of *vgll3* genotypes on sea age at maturity is altered in farmed
- 453 mowi strain Atlantic salmon. *BMC Genet.*, 20, 44.
- 454 6.
- 455 Bal, G., Montorio, L., Rivot, E., Prevost, E., Bagliniere, J.L. & Nevoux, M. (2017). Evidence for
- 456 long-term change in length, mass and migration phenology of anadromous spawners
- 457 in French Atlantic salmon *Salmo salar*. *J. Fish Biol.*, 90, 2375-2393.
- 458 7.
- 459 Bandillo, N.B., Anderson, J.E., Kantar, M.B., Stupar, R.M., Specht, J.E., Graef, G.L. *et al.*
- 460 (2017). Dissecting the genetic basis of local adaptation in soybean. *Sci. Rep.*, 7,
- 461 17195.
- 462 8.
- 463 Barson, N.J., Aykanat, T., Hindar, K., Baranski, M., Bolstad, G.H., Fiske, P. *et al.* (2015). Sex-
- 464 dependent dominance at a single locus maintains variation in age at maturity in
- 465 salmon. *Nature*, 528, 405-408.
- 466 9.
- 467 Besnier, F., Ayllon, F., Skaala, Ø., Solberg, M.F., Fjeldheim, P.T., Anderson, K.C. *et al.* (2022).
- 468 Introgression of domesticated salmon changes life history and phenology of a wild
- 469 salmon population. *Evol. Appl.*, 15, 853-864.
- 470 10.
- 471 Boulding, E.G., Ang, K.P., Elliott, J.A.K., Powell, F. & Schaeffer, L.R. (2019). Differences in
- 472 genetic architecture between continents at a major locus previously associated with
- 473 sea age at sexual maturity in European Atlantic salmon. *Aquac.*, 500, 670-678.
- 474 11.
- 475 Candolin, U. & Heuschele, J. (2008). Is sexual selection beneficial during adaptation to
- 476 environmental change? *Trends Ecol. Evol.*, 23, 446-452.
- 477 12.
- 478 Chevin, L.M., Lande, R. & Mace, G.M. (2010). Adaptation, plasticity, and extinction in a
- 479 changing environment: towards a predictive theory. *PLoS Biol.*, 8, e1000357.

- 480 13.  
481 Czorlich, Y., Aykanat, T., Erkinaro, J., Orell, P. & Primmer, C.R. (2018). Rapid sex-specific  
482 evolution of age at maturity is shaped by genetic architecture in Atlantic salmon.  
483 *Nat. Ecol. Evol.*, 2, 1800-1807.
- 484 14.  
485 Dullinger, S., Gattringer, A., Thuiller, W., Moser, D., Zimmermann, N.E., Guisan, A. *et al.*  
486 (2012). Extinction debt of high-mountain plants under twenty-first-century climate  
487 change. *Nat. Clim. Change*, 2, 619-622.
- 488 15.  
489 Eisbrenner, W.D., Botwright, N., Cook, M., Davidson, E.A., Dominik, S., Elliott, N.G. *et al.*  
490 (2014). Evidence for multiple sex-determining loci in Tasmanian Atlantic salmon  
491 (*Salmo salar*). *Heredity*, 113, 86-92.
- 492 16.  
493 Fleming, I.A. & Einum, S. (2011). Reproductive Ecology: A Tale of Two Sexes In: *Atlantic*  
494 *Salmon Ecology* (eds. Aas, Ø, Einum, S, Klemetsen, A & Skurdal, J). Blackwell  
495 Publishing, pp. 33-65.
- 496 17.  
497 Forseth, T., Barlaup, B.T., Finstad, B., Fiske, P., Gjøsæter, H., Falkegård, M. *et al.* (2017). The  
498 major threats to Atlantic salmon in Norway. *ICES J. Mar. Sci.*, 74, 1496-1513.
- 499 18.  
500 García de Leániz, C., Fleming, I.A., Einum, S., Verspoor, E., Jordan, W.C., Consuegra, S. *et al.*  
501 (2007). A critical review of adaptive genetic variation in Atlantic salmon: implications  
502 for conservation. *Biol. Rev.*, 82, 173-211.
- 503 19.  
504 Gilbey, J., Utne, K.R., Wennevik, V., Beck, A.C., Kausrud, K., Hindar, K. *et al.* (2021). The early  
505 marine distribution of Atlantic salmon in the North-east Atlantic: A genetically  
506 informed stock-specific synthesis. *Fish Fish.*, 22, 1274-1306.
- 507 20.  
508 Glover, K.A., Pertoldi, C., Besnier, F., Wennevik, V., Kent, M. & Skaala, Ø. (2013). Atlantic  
509 salmon populations invaded by farmed escapees: quantifying genetic introgression  
510 with a Bayesian approach and SNPs. *BMC Genet.*, 14, 74.
- 511 21.  
512 Halperin, D.S., Pan, C., Lusi, A.J. & Tontonoz, P. (2013). Vestigial-like 3 is an inhibitor of  
513 adipocyte differentiation. *J. Lipid Res.*, 54, 473-481.
- 514 22.  
515 Harvey, A.C., Skaala, O., Borgstrom, R., Fjeldheim, P.T., Andersen, K.C., Rong Utne, K. *et al.*  
516 (2022). Time series covering up to four decades reveals major changes and drivers of  
517 marine growth and proportion of repeat spawners in an Atlantic salmon population.  
518 *Ecol. Evol.*, 12, e8780.
- 519 23.  
520 Harvey, A.C., Tang, Y., Wennevik, V., Skaala, O. & Glover, K.A. (2017). Timing is everything:  
521 Fishing-season placement may represent the most important angling-induced  
522 evolutionary pressure on Atlantic salmon populations. *Ecol. Evol.*, 7, 7490-7502.
- 523 24.  
524 ICES (2008). Report of the Working Group on Widely Distributed Stocks (WGWIDE).
- 525 25.

- 526 ICES (2021a). ICES Working Group on the Integrated Assessments of the Norwegian Sea  
527 (WGINOR; outputs from 2020 meeting). 3. 114 pp.  
528 26.
- 529 ICES (2021b). Working Group on Widely Distributed Stocks (WGWIDE). 3:95. 874 pp.  
530 27.
- 531 Jensen, A.J., Hagen, I.J., Czorlich, Y., Bolstad, G.H., Bremset, G., Finstad, B. *et al.* (2022).  
532 Large-effect loci mediate rapid adaptation of salmon body size after river regulation.  
533 *Proc. Natl. Acad. Sci. U. S. A.*, 119, e2207634119.  
534 28.
- 535 Karlsson, S., Diserud, O.H., Fiske, P. & Hindar, K. (2016). Widespread genetic introgression of  
536 escaped farmed Atlantic salmon in wild salmon populations. *ICES J. Mar. Sci.*, 73,  
537 2488-2498.  
538 29.
- 539 Kwan, L., Bedhomme, S., Prasad, N.G. & Chippindale, A.K. (2008). Sexual conflict and  
540 environmental change: trade-offs within and between the sexes during the evolution  
541 of desiccation resistance. *J. Genet.*, 87, 383–394.  
542 30.
- 543 Losos, J.B. (2000). Ecological character displacement and the study of adaptation. *PNAS*, 97,  
544 5693-5695.  
545 31.
- 546 Mobley, K.B., Aykanat, T., Czorlich, Y., House, A., Kurko, J., Miettinen, A. *et al.* (2021).  
547 Maturation in Atlantic salmon (*Salmo salar*, Salmonidae): a synthesis of ecological,  
548 genetic, and molecular processes. *Reviews in Fish Biology and Fisheries*, 31, 523-571.  
549 32.
- 550 Mohamed, A.R., Verbyla, K.L., Al-Mamun, H.A., McWilliam, S., Evans, B., King, H. *et al.*  
551 (2019). Polygenic and sex specific architecture for two maturation traits in farmed  
552 Atlantic salmon. *BMC Genom.*, 20, 139.  
553 33.
- 554 Otero, J., Jensen, A.J., L'Abée-Lund, J.H., Stenseth, N.C., Storvik, G.O. & Vollestad, L.A.  
555 (2012). Contemporary ocean warming and freshwater conditions are related to later  
556 sea age at maturity in Atlantic salmon spawning in Norwegian rivers. *Ecol. Evol.*, 2,  
557 2192-2203.  
558 34.
- 559 Parker, G.A. (1974). Sexual selection and sexual conflict. In: *Sexual Selection and*  
560 *Reproductive Competition in Insects* (eds. BLUM, NA & BLUM, MS). Academic Press,  
561 Cambridge, pp. 123-166.  
562 35.
- 563 Pörtner, H.O., Roberts, D.C., Tignor, M., Poloczanska, E.S., Mintenbeck, K., Alegría, A. *et al.*  
564 (2022). IPCC, 2022: Climate Change 2022: Impacts, Adaptation, and Vulnerability.  
565 Contribution of Working Group II to the Sixth Assessment Report of the  
566 Intergovernmental Panel on Climate Change.  
567 36.
- 568 Quinn, T.P., McGinnity, P. & Cross, T.F. (2006). Long-term declines in body size and shifts in  
569 run timing of Atlantic salmon in Ireland. *J. Fish Biol.*, 68, 1713-1730.  
570 37.
- 571 Rowe, D.K., Thorpe, J.E. & Shanks, A.M. (1991). Role of fat stores in the maturation of male  
572 Atlantic salmon (*Salmo salar*) parr. *Can. J. Fish. Aquat. Sci.*, 48, 405-413.

- 573 38.  
574 Rowe, L., Chenoweth, S.F. & Agrawal, A.F. (2018). The genomics of sexual conflict. *Am. Nat.*,  
575 192, 274-286.
- 576 39.  
577 Simpson, A.L. (1992). Differences in body size and lipid reserves between maturing and  
578 nonmaturing Atlantic salmon parr, *Salmo salar* L. *Can. J. Zool.*, 70.
- 579 40.  
580 Sinclair-Waters, M., Odegard, J., Korsvoll, S.A., Moen, T., Lien, S., Primmer, C.R. *et al.* (2020).  
581 Beyond large-effect loci: large-scale GWAS reveals a mixed large-effect and polygenic  
582 architecture for age at maturity of Atlantic salmon. *Genet Sel Evol*, 52, 9.
- 583 41.  
584 Skagseth, Ø., Broms, C., Gundersen, K., Hátún, H., Kristiansen, I., Larsen, K.M.H. *et al.* (2022).  
585 Arctic and Atlantic waters in the Norwegian Basin, between year variability and  
586 potential ecosystem implications. *Front. Mar. Sci.*, 9.
- 587 42.  
588 Skagseth, Ø. & Mork, K.A. (2012). Heat content in the Norwegian Sea, 1995–2010. *ICES J.*  
589 *Mar. Sci.*, 69, 826-832.
- 590 43.  
591 Stephens, M., Smith, E.P. & Donnelly, P. (2001). A new statistical method for haplotype  
592 reconstruction from population data. *Am. J. Hum. Genet.*, 68, 978–989.
- 593 44.  
594 Taranger, G.L., Carrillo, M., Schulz, R.W., Fontaine, P., Zanuy, S., Felip, A. *et al.* (2010).  
595 Control of puberty in farmed fish. *Gen. Comp. Endocrinol.*, 165, 483-515.
- 596 45.  
597 Team, R.C. (2022). R: A language and environment for statistical computing. In: *R*  
598 *Foundation for Statistical Computing* Vienna, Austria.
- 599 46.  
600 Todd, C.D., Hanson, N.N., Boehme, L., Revie, C.W. & Marques, A.R. (2021). Variation in the  
601 post-smolt growth pattern of wild one sea-winter salmon (*Salmo salar* L.), and its  
602 linkage to surface warming in the eastern North Atlantic Ocean. *J. Fish Biol.*, 98, 6-16.
- 603 47.  
604 Utne, K.R., Díaz Pauli, B., Haugland, M., Jacobsen, J.A., Maoileidigh, N., Melle, W. *et al.*  
605 (2021a). Poor feeding opportunities and reduced condition factor for salmon post-  
606 smolts in the Northeast Atlantic Ocean. *ICES J. Mar. Sci.*, 78, 2844-2857.
- 607 48.  
608 Utne, K.R., Skagseth, Ø., Wennevik, V., Broms, C.T., Melle, W. & Thorstad, E.B. (2022).  
609 Impacts of a changing ecosystem on the feeding and feeding conditions for Atlantic  
610 salmon during the first months at sea. *Front. Mar. Sci.*, 9.
- 611 49.  
612 Utne, K.R., Thomas, K., Jacobsen, J.A., Fall, J., Maoiléidigh, N.Ó., Broms, C.T. *et al.* (2021b).  
613 Feeding interactions between Atlantic salmon (*Salmo salar*) postsmolts and other  
614 planktivorous fish in the Northeast Atlantic. *Can. J. Fish. Aquat. Sci.*, 78, 255-268.
- 615 50.  
616 Vollset, K.W., Urdal, K., Utne, K.R., Thorstad, E.B., Sægvog, H., Raunsgard, A. *et al.* (2022).  
617 Ecological regime shift in the Northeast Atlantic Ocean revealed from the  
618 unprecedented reduction in marine growth of Atlantic salmon. *Sci. Adv.*, 8.
- 619 51.

620 Yano, A., Guyomard, R., Nicol, B., Jouanno, E., Quillet, E., Klopp, C. *et al.* (2012). An immune-  
621 related gene evolved into the master sex-determining gene in rainbow trout,  
622 *Oncorhynchus mykiss*. *Curr. Biol.*, 22, 1423-1428.  
623  
624  
625



626

627

628 **Competing interests**

629 The authors declare no competing interests.

630 **TABLES**

631

632 **Table 1.** Comparison of fish length between historical and contemporary samples

633 during first winter at sea (immature fish), adult maturing after one sea winter (1SW),

634 and adult maturing after 2 winters at sea (2SW).

635

|         | phenotype                  | Mean value<br>(cm)<br>1983-1984 | Mean value<br>(cm)<br>2013-2016 | df  | t    | p      |
|---------|----------------------------|---------------------------------|---------------------------------|-----|------|--------|
| Females | First sea<br>winter length | 47.2                            | 41.7                            | 500 | 14   | <0.001 |
|         | 1SW adult<br>length        | 55.1                            | 55.0                            | 37  | 0.89 | 0.37   |
|         | 2SW adult<br>length        | 79.4                            | 75.3                            | 202 | 5.50 | <0.001 |
| Males   | First sea<br>winter length | 45.4                            | 41.0                            | 711 | 13.2 | <0.001 |
|         | 1SW adult<br>length        | 55.6                            | 56.8                            | 441 | 2.7  | 0.007  |
|         | 2SW adult<br>length        | 80.6                            | 72.6                            | 85  | 5.4  | <0.001 |

636

637

638

639 **Table 2.** Percentage and numbers (in brackets) of fish displaying 1-2-3<sup>+</sup> sea winter

640 (SW) of age at maturation, by sex, in the historical (H – 1983/84, N = 797) and

641 contemporary (C – 2013-2016, N = 751) samples.

|           | <b>1SW % (N)</b> | <b>2SW % (N)</b> | <b>3<sup>+</sup>SW % (N)</b> |
|-----------|------------------|------------------|------------------------------|
| Females_H | 46 (141)         | 37 (114)         | 17 (51)                      |
| Females_C | 8 (30)           | 63 (227)         | 28 (102)                     |
| Males_H   | 75 (311)         | 13 (56)          | 12 (48)                      |
| Males_C   | 58 (227)         | 33 (127)         | 9 (36)                       |

642

643

644

645 **Table 3.** Observed occurrences of each haplotype per sex and associated Mean Sea Age (M.S.A) in the historical, contemporary

646 and farmed samples. (M.S.A is calculated as mean sea age of the samples that are homozygous for the haplotype.)

|              | Haplotypes | Historical          |       |                     |       | Contemporary        |       |                     |       | Farmed <sup>647</sup> |                     |
|--------------|------------|---------------------|-------|---------------------|-------|---------------------|-------|---------------------|-------|-----------------------|---------------------|
|              |            | F                   |       | M                   |       | F                   |       | M                   |       | F                     | M                   |
|              |            | % <sub>(N)</sub>    | M.S.A | % <sub>(N)</sub>    | M.S.A | % <sub>(N)</sub>    | M.S.A | % <sub>(N)</sub>    | M.S.A | % <sub>(N)</sub>      | % <sub>(N)</sub>    |
| <i>vgII3</i> | 1221       | 59 <sub>(364)</sub> | 1.2   | 54 <sub>(455)</sub> | 1.1   | 61 <sub>(438)</sub> | 2.2   | 58 <sub>(454)</sub> | 1.4   | 53 <sub>(93)</sub>    | 63 <sub>(264)</sub> |
|              | 1222       | 0 <sub>(0)</sub>    | NA    | 0 <sub>(1)</sub>    | NA    | 0 <sub>(0)</sub>    | NA    | 0 <sub>(1)</sub>    | NA    | 0 <sub>(0)</sub>      | 0 <sub>(0)</sub>    |
|              | 1111       | 1.5 <sub>(9)</sub>  | NA    | 2 <sub>(17)</sub>   | NA    | 0 <sub>(0)</sub>    | NA    | 0 <sub>(0)</sub>    | NA    | 0 <sub>(0)</sub>      | 0 <sub>(1)</sub>    |
|              | 1112       | 0 <sub>(1)</sub>    | NA    | 0 <sub>(0)</sub>    | NA    | 0 <sub>(0)</sub>    | NA    | 0 <sub>(1)</sub>    | NA    | 0 <sub>(0)</sub>      | 0 <sub>(1)</sub>    |
|              | 2221       | 1 <sub>(9)</sub>    | NA    | 2 <sub>(18)</sub>   | NA    | 1 <sub>(9)</sub>    | NA    | 1 <sub>(13)</sub>   | NA    | 3 <sub>(5)</sub>      | 5 <sub>(24)</sub>   |
|              | 2222       | 0 <sub>(0)</sub>    | NA    | 0.5 <sub>(3)</sub>  | NA    | 0 <sub>(3)</sub>    | NA    | 0 <sub>(0)</sub>    | NA    | 0 <sub>(0)</sub>      | 0 <sub>(0)</sub>    |
|              | 2111       | 1.5 <sub>(5)</sub>  | NA    | 0.5 <sub>(4)</sub>  | NA    | 0 <sub>(0)</sub>    | NA    | 1 <sub>(0)</sub>    | NA    | 0 <sub>(0)</sub>      | 0 <sub>(1)</sub>    |
|              | 2112       | 37 <sub>(230)</sub> | 2.5   | 41 <sub>(344)</sub> | 2.5   | 38 <sub>(272)</sub> | 2.5   | 40 <sub>(309)</sub> | 2.2   | 44 <sub>(76)</sub>    | 31 <sub>(128)</sub> |
| <i>six6</i>  | 111        | 41 <sub>(256)</sub> | 1.4   | 40 <sub>(337)</sub> | 1.2   | 23 <sub>(166)</sub> | 2.3   | 25 <sub>(195)</sub> | 1.6   | 16 <sub>(29)</sub>    | 14 <sub>(65)</sub>  |
|              | 112        | 0 <sub>(3)</sub>    | NA    | 1 <sub>(8)</sub>    | NA    | 0 <sub>(0)</sub>    | NA    | 0 <sub>(0)</sub>    | NA    | 0 <sub>(0)</sub>      | 0 <sub>(0)</sub>    |
|              | 121        | 24 <sub>(146)</sub> | 2.5   | 27 <sub>(225)</sub> | 1.5   | 31 <sub>(227)</sub> | 2.4   | 35 <sub>(275)</sub> | 1.5   | 42 <sub>(76)</sub>    | 44 <sub>(194)</sub> |
|              | 122        | 21 <sub>(127)</sub> | 2.3   | 19 <sub>(160)</sub> | 2.0   | 29 <sub>(209)</sub> | 2.6   | 26 <sub>(203)</sub> | 1.4   | 26 <sub>(48)</sub>    | 26 <sub>(115)</sub> |
|              | 211        | 12 <sub>(73)</sub>  | 1.6   | 12 <sub>(100)</sub> | 1.2   | 11 <sub>(80)</sub>  | 2.3   | 10 <sub>(80)</sub>  | 2.0   | 2 <sub>(3)</sub>      | 2 <sub>(8)</sub>    |
|              | 221        | 1 <sub>(8)</sub>    | NA    | 1 <sub>(11)</sub>   | NA    | 4 <sub>(28)</sub>   | NA    | 3 <sub>(25)</sub>   | NA    | 14 <sub>(26)</sub>    | 14 <sub>(62)</sub>  |
|              | 222        | 1 <sub>(5)</sub>    | NA    | 0 <sub>(1)</sub>    | NA    | 2 <sub>(12)</sub>   | NA    | 1 <sub>(2)</sub>    | NA    | 0 <sub>(0)</sub>      | 0 <sub>(0)</sub>    |

648

649

## 650 **FIGURE LEGENDS**

651

652 **Figure 1: Scan for SNP association with age at maturation.** Red dots

653 represent SNPs with significant association with sea age ( $p < 0.01$  after

654 correction for multiple tests). Females from 1983-84 (**A**), males from

655 1983-84 (**B**), females from 2013-16 (**C**) and males from 2013-16 (**D**).

656

657 **Figure 2: Mean sea age of the samples for each class of genotypes at**

658 ***vgll3* and *six6*.** Females from 1983-84 (**A**), males from 1983-84 (**B**),

659 females from 2013-16 (**C**) and males from 2013-16 (**D**).

660

661

662

663

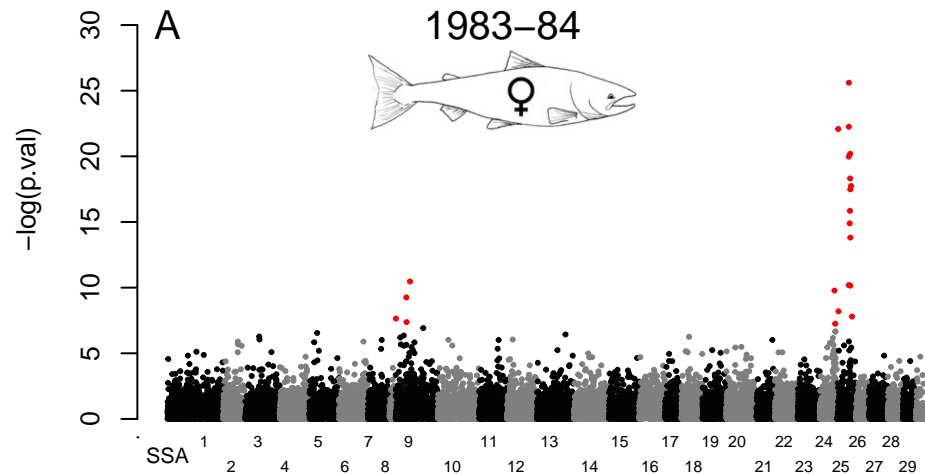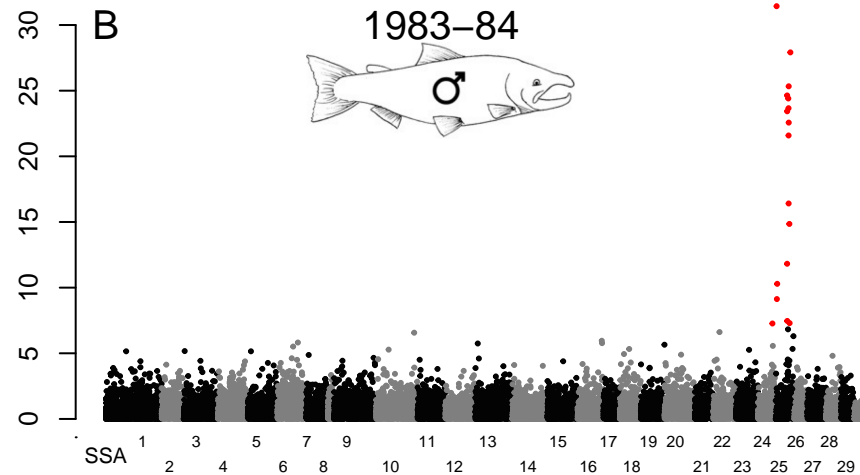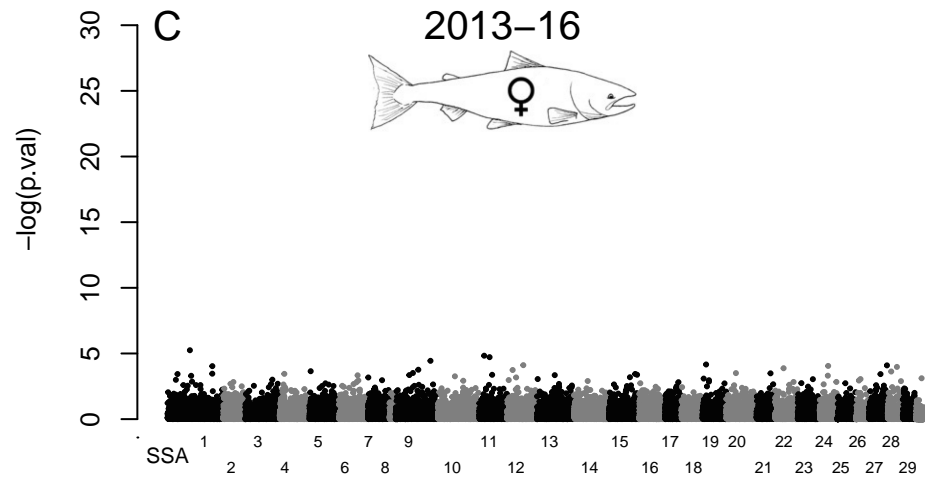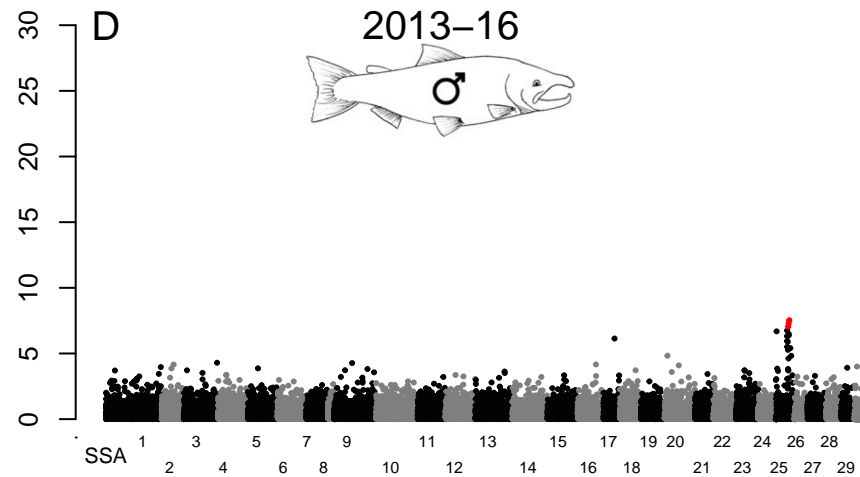

Number of late alleles

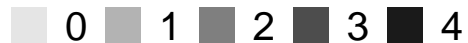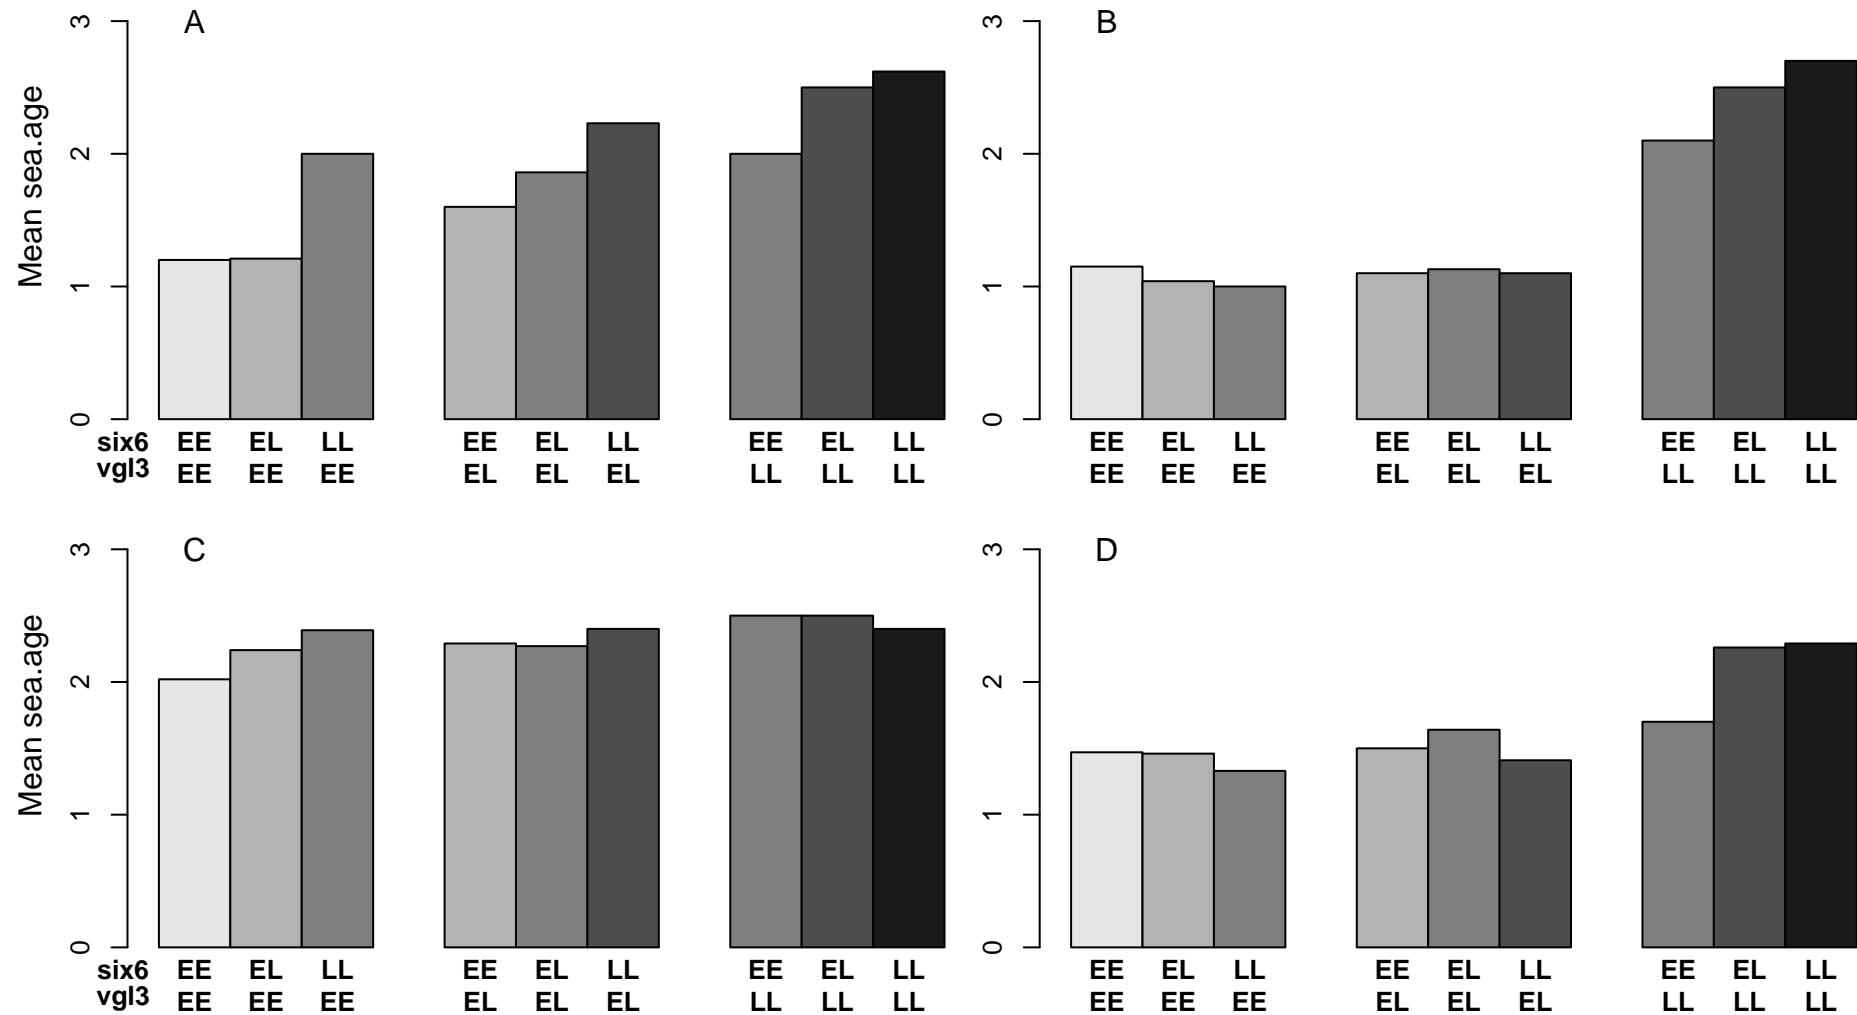

Source: https://www.biorxiv.org/content/10.1101/2022.10.27.514021v3.full.pdf
